# Supplementary material for: Responses to reduced nicotine cigarette marketing features: a systematic review
Source: HighWire-hosted journal article supplement (doi:10.1136/tobaccocontrol-2021-056826), 2021-10-07
Supplement: tobaccocontrol-2021-056826supp001_data_supplement.pdf [file tobaccocontrol-2021-056826supp001_data_supplement.pdf]

## SUPPLEMENTAL MATERIALS

## 1. Search Terms

| Topic                           | General Terms                                              | Search Field Terms                                                                                                                                                                                                                                                                                                                                                                                                                                                                                                                                                                                                                                                                                                                      |
|---------------------------------|------------------------------------------------------------|-----------------------------------------------------------------------------------------------------------------------------------------------------------------------------------------------------------------------------------------------------------------------------------------------------------------------------------------------------------------------------------------------------------------------------------------------------------------------------------------------------------------------------------------------------------------------------------------------------------------------------------------------------------------------------------------------------------------------------------------|
| <b>Reduced nicotine product</b> | Reduced nicotine, reduced exposure                         | (reduced nicotine[tiab] OR RNC[tiab] nicotine reduction[tiab] OR reducing nicotine[tiab] OR low nicotine[tiab] OR very low nicotine[tiab] OR VLNC[tiab] OR lower nicotine[tiab] OR less nicotine[tiab] OR remov* nicotine[tiab] OR nicotine content[tiab] OR reduced exposure[tiab] OR reduced-exposure[tiab] OR reduced exposure products[tiab] OR reduced exposure tobacco products[tiab] OR PREP[tiab] OR PREPs[tiab] OR MRTP[tiab] OR modified risk[tiab] OR denicotin*[tiab] OR zero nicotine[tiab] OR nonnicotine[tiab] OR nicotine free[tiab] OR nicotine regulation[tiab] OR regulation of nicotine[tiab] OR Quest[tiab] OR nicotine[mesh] OR harm reduction[mesh] OR risk reduction behavior[mesh] OR smoking reduction[mesh]) |
| <b>Cigarettes</b>               | Cigarettes, combustible tobacco product, cigarette smoking | <b>AND</b> (cigar*[tiab] OR combustible*[tiab] OR smoking[mesh] OR tobacco products[mesh] OR cigarette smoking[mesh])                                                                                                                                                                                                                                                                                                                                                                                                                                                                                                                                                                                                                   |

| Topic                     | General Terms                                  | Search Field Terms                                                                                                                                                                                                                                                                                                                                                                                                                                                                                                                                                                                                                                                                               |
|---------------------------|------------------------------------------------|--------------------------------------------------------------------------------------------------------------------------------------------------------------------------------------------------------------------------------------------------------------------------------------------------------------------------------------------------------------------------------------------------------------------------------------------------------------------------------------------------------------------------------------------------------------------------------------------------------------------------------------------------------------------------------------------------|
| <b>Marketing Features</b> | 4Ps - Promotion, Product, Price, and Placement | <b>AND</b> (communication*[tiab] OR communicate*[tiab] OR market*[tiab] OR ad[tiab] OR ads[tiab] OR advertis*[tiab] OR promotion*[tiab] OR brand*[tiab] OR pack*[tiab] OR price[tiab] OR claim[tiab] OR descriptor[tiab] OR display[tiab] OR sale[tiab] OR discount[tiab] OR position[tiab] OR placement[tiab] OR sign[tiab] OR media[tiab] OR point of sale[tiab] OR internet[tiab] OR online[tiab] OR print[tiab] OR television[tiab] OR radio[tiab] OR warning[tiab] OR messag*[tiab] OR counter*[tiab] OR campaign[tiab] OR education[tiab] OR marketing[mesh] OR consumer*[mesh] OR product packaging[mesh] OR health communication[mesh] OR communication[mesh] OR health education[mesh]) |
| <b>Language</b>           | English only                                   | <b>AND</b> (eng[Language])                                                                                                                                                                                                                                                                                                                                                                                                                                                                                                                                                                                                                                                                       |

*Note. We aimed for parsimonious terms where possible, particularly when accounting for MESH terms, by using the highest hierarchical term. For instance, “cigarettes” is a subheading within “tobacco products,” so we included the latter MESH term.*

## 2. Feature Descriptions

| ID | Authors                                                                                | Year | Sample Size | Type                  | Data Collection Type | Smoking Status                 | Commercial Exposure Medium | Commercial Exposure Feature | Commercial Exposure Detail | Public Health Exposure Medium | Public Health Exposure Feature | Public Health Exposure Detail                                                                                                                                                                                                                                                |
|----|----------------------------------------------------------------------------------------|------|-------------|-----------------------|----------------------|--------------------------------|----------------------------|-----------------------------|----------------------------|-------------------------------|--------------------------------|------------------------------------------------------------------------------------------------------------------------------------------------------------------------------------------------------------------------------------------------------------------------------|
| 1  | Bolcic-Jankovic, Dragana; Biener, Lois                                                 | 2015 | 934         | Non-experimental      | Cross-sectional      | Nonsmokers and current smokers | n/a                        | n/a                         | n/a                        | General                       | Descriptor                     | Nicotine is the substance in cigarettes that makes people get addicted to smoking. The FDA has the authority to reduce the amount of nicotine in cigarettes to a very low level.                                                                                             |
| 2  | Byron, M. Justin; Hall, Marissa G.; King, Jessica L.; Ribisl, Kurt M.; Brewer, Noel T. | 2019 | 1353        | Randomized Experiment | Cross-sectional      | Nonsmokers and current smokers | n/a                        | n/a                         | n/a                        | General                       | Descriptor                     | (1) concise language; (2) a percentage; (3) an interpretation; (4) a percentage and interpretation; (5) a percentage and a pictograph; or (6) a percentage, interpretation, and pictograph; or to a control description using (7) FDA's "minimally or nonaddictive" phrasing |
| 3  | Byron, M. Justin; Jeong, Michelle;                                                     | 2018 | 650         | Non-experimental      | Cross-sectional      | Current smokers                | n/a                        | n/a                         | n/a                        | General                       | Descriptor                     | Imagine the government required tobacco companies to                                                                                                                                                                                                                         |

| ID | Authors                                                                           | Year | Sample Size | Type                  | Data Collection Type | Smoking Status                                    | Commercial Exposure Medium | Commercial Exposure Feature          | Commercial Exposure Detail                                                                                                                          | Public Health Exposure Medium | Public Health Exposure Feature | Public Health Exposure Detail                                                                                                                                                           |
|----|-----------------------------------------------------------------------------------|------|-------------|-----------------------|----------------------|---------------------------------------------------|----------------------------|--------------------------------------|-----------------------------------------------------------------------------------------------------------------------------------------------------|-------------------------------|--------------------------------|-----------------------------------------------------------------------------------------------------------------------------------------------------------------------------------------|
|    | Abrams, David B.; Brewer, Noel T.                                                 |      |             |                       |                      |                                                   |                            |                                      |                                                                                                                                                     |                               |                                | remove most of the nicotine from cigarettes.                                                                                                                                            |
| 4  | Chung-Hall, Janet; Fong, Geoffrey T.; Driezen, Pete; Craig, Lorraine              | 2018 | 3215        | Non-experimental      | Cross-sectional      | Current smokers (only and dual e-cigarette users) | n/a                        | n/a                                  | n/a                                                                                                                                                 | General                       | Descriptor                     | If you could get nicotine in products other than tobacco, would you support or oppose a law that reduced the amount of nicotine in cigarettes and tobacco, to make them less addictive? |
| 5  | Connolly, Gregory N.; Behm, Ilan; Heaton, Cheryl G.; Alpert, Hillel R.            | 2012 | 1021        | Non-experimental      | Cross-sectional      | Nonsmokers and current smokers                    | n/a                        | n/a                                  | n/a                                                                                                                                                 | General                       | Descriptor                     | Do you think that the FDA should reduce nicotine in cigarettes if it would cause fewer kids to become addicted or hooked on smoking?                                                    |
| 6  | Denlinger-Apte, Rachel L.; Joel, Danielle L.; Strasser, Andrew A.; Donny, Eric C. | 2017 | 68          | Randomized Experiment | Cross-sectional      | Current smokers                                   | General                    | Descriptor in context of product use | The next cigarette that you will be smoking contains a very low/average nicotine level, compared to most cigarettes available in the United States. | n/a                           | n/a                            | n/a                                                                                                                                                                                     |
| 7  | Denlinger-Apte, Rachel L.; Tidey, Jennifer W.;                                    | 2019 | 360         | Randomized Experiment | Longitudinal         | Current smokers                                   | n/a                        | n/a                                  | n/a                                                                                                                                                 | General                       | Descriptor in context          | Would you support or oppose a law that                                                                                                                                                  |

| ID | Authors                                                                                                                | Year | Sample Size | Type               | Data Collection Type | Smoking Status  | Commercial Exposure Medium | Commercial Exposure Feature | Commercial Exposure Detail | Public Health Exposure Medium | Public Health Exposure Feature | Public Health Exposure Detail                                                                                                                                                                                                                                                       |
|----|------------------------------------------------------------------------------------------------------------------------|------|-------------|--------------------|----------------------|-----------------|----------------------------|-----------------------------|----------------------------|-------------------------------|--------------------------------|-------------------------------------------------------------------------------------------------------------------------------------------------------------------------------------------------------------------------------------------------------------------------------------|
|    | Koopmeiners, Joseph S.; Hatsukami, Dorothy K.; Smith, Tracy T.; Pacek, Lauren R.; McClernon, F. Joseph; Donny, Eric C. |      |             |                    |                      |                 |                            |                             |                            |                               | of product use                 | reduced the amount of nicotine in cigarettes, to make cigarettes less addictive?                                                                                                                                                                                                    |
| 8  | Fix, Brian V.; O'Connor, Richard J.; Fong, Geoffrey T.; Borland, Ron; Cummings, K. M.; Hyland, Andrew                  | 2011 | 678         | Non-experimental   | Cross-sectional      | Current smokers | n/a                        | n/a                         | n/a                        | General                       | Descriptor                     | If nicotine was made easily available in non-cigarette form, would you support or oppose a law that reduced the amount of nicotine in cigarettes, to make cigarettes less addictive?                                                                                                |
| 9  | Fraser, Trish; Kira, Anette                                                                                            | 2017 | 21          | Quasi-Experimental | Longitudinal         | Current smokers | Pack, Product              | General                     | Branding                   | General                       | Descriptor                     | Lead researcher informed the participants of the potential benefits of VLNC cigarettes and a mandated VLNC cigarette-only policy, such as prevention of addiction to nicotine, reduction of tobacco dependence leading to increased quitting smoking and that a VLNC cigarette-only |

| ID | Authors                                                                                                      | Year | Sample Size | Type                  | Data Collection Type | Smoking Status                 | Commercial Exposure Medium | Commercial Exposure Feature | Commercial Exposure Detail                  | Public Health Exposure Medium | Public Health Exposure Feature | Public Health Exposure Detail                                                                                                                                                                                               |
|----|--------------------------------------------------------------------------------------------------------------|------|-------------|-----------------------|----------------------|--------------------------------|----------------------------|-----------------------------|---------------------------------------------|-------------------------------|--------------------------------|-----------------------------------------------------------------------------------------------------------------------------------------------------------------------------------------------------------------------------|
|    |                                                                                                              |      |             |                       |                      |                                |                            |                             |                                             |                               |                                | policy might be the best policy option for VLNC cigarettes as it reduces the risk of smokers smoking both low and HNC cigarettes.                                                                                           |
| 10 | Gallopel-Morvan, Karine; Moodie, Crawford; Hammond, David; Eker, Figen; Beguinot, Emmanuelle; Martinet, Yves | 2011 | 836         | Non-experimental      | Cross-sectional      | Nonsmokers and current smokers | General                    | Descriptor                  | 0.8mg vs. 0.9mg                             | n/a                           | n/a                            | n/a                                                                                                                                                                                                                         |
| 11 | Hall, Marissa G.; Byron, Justin M.; Brewer, Noel T.; Noar, Seth M.; Ribisl, Kurt M.                          | 2019 | 1712        | Randomized Experiment | Cross-sectional      | Current smokers                | n/a                        | n/a                         | n/a                                         | General                       | Descriptor                     | Imagine a new law requiring tobacco companies to remove 95% of the nicotine in cigarettes. Stores could legally sell only these new very low nicotine cigarettes, but not cigarettes that have regular amounts of nicotine. |
| 12 | Johnson, Andrea C.; Mays, Darren; Villanti, Andrea C.; Niaura, Raymond S.; Rehberg, Kathryn; Phan,           | 2019 | 426         | Randomized Experiment | Cross-sectional      | Current smokers                | Ad                         | Pack color                  | Blue v. red package color for implicit risk | n/a                           | n/a                            | n/a                                                                                                                                                                                                                         |

| ID | Authors                                                                                                                                       | Year | Sample Size | Type                  | Data Collection Type | Smoking Status  | Commercial Exposure Medium | Commercial Exposure Feature          | Commercial Exposure Detail                                                                                                                                                                                                                 | Public Health Exposure Medium | Public Health Exposure Feature | Public Health Exposure Detail                                                        |
|----|-----------------------------------------------------------------------------------------------------------------------------------------------|------|-------------|-----------------------|----------------------|-----------------|----------------------------|--------------------------------------|--------------------------------------------------------------------------------------------------------------------------------------------------------------------------------------------------------------------------------------------|-------------------------------|--------------------------------|--------------------------------------------------------------------------------------|
|    | Lilianna; Mercincavage, Melissa; Luta, George; Strasser, Andrew A.                                                                            |      |             |                       |                      |                 |                            |                                      |                                                                                                                                                                                                                                            |                               |                                |                                                                                      |
| 13 | Lochbuehler, Kirsten; Tang, Kathy Z.; Souprountchouk, Valentina; Campetti, Dana; Cappella, Joseph N.; Kozlowski, Lynn T.; Strasser, Andrew A. | 2016 | 203         | Randomized Experiment | Cross-sectional      | Current smokers | Ad                         | Pack color                           | Blue (inaccurate) v. red (accurate) packaging color for implicit risk                                                                                                                                                                      | Counter-messaging             | Warning                        | Text-only warnings (e.g., Not intended for quitting; Pregnant women Surgeon General) |
| 14 | Mercincavage, Melissa; Saddleson, Megan L.; Gup, Emily; Halstead, Angela; Mays, Darren; Strasser, Andrew A.                                   | 2017 | 77          | Randomized Experiment | Longitudinal         | Current smokers | Ad, Product                | General                              | Branding                                                                                                                                                                                                                                   | n/a                           | n/a                            | n/a                                                                                  |
| 15 | Mercincavage, Melissa; Smyth, Joshua M.; Strasser, Andrew A.; Branstetter, Steven A.                                                          | 2016 | 36          | Randomized Experiment | Longitudinal         | Current smokers | General                    | Descriptor in context of product use | The cigarette you are smoking contains:<br>(1) "...the same level of nicotine as your usual brand.<br>(2) "...a low level of nicotine compared to your usual brand.<br>(3) "...a very low level of nicotine compared to your usual brand." | n/a                           | n/a                            | n/a                                                                                  |

| ID | Authors                                                                                                            | Year | Sample Size | Type               | Data Collection Type | Smoking Status                                              | Commercial Exposure Medium | Commercial Exposure Feature | Commercial Exposure Detail                                                                                                                                                                                                                          | Public Health Exposure Medium | Public Health Exposure Feature | Public Health Exposure Detail |
|----|--------------------------------------------------------------------------------------------------------------------|------|-------------|--------------------|----------------------|-------------------------------------------------------------|----------------------------|-----------------------------|-----------------------------------------------------------------------------------------------------------------------------------------------------------------------------------------------------------------------------------------------------|-------------------------------|--------------------------------|-------------------------------|
| 16 | Nguyen, Anh B.; Zhao, Xiaoquan; Hoffman, Leah; Morse, Aura Lee; Delahanty, Janine                                  | 2018 | 5474        | Non-experimental   | Cross-sectional      | Non, Current, and Former smokers                            | General                    | Descriptor                  | Rated whether a cigarette advertised as "low nicotine": (1) be more or less harmful than a typical cigarette; (2) have lower or higher risk of causing lung cancer than a typical cigarette; (3) be more or less addictive than a typical cigarette | n/a                           | n/a                            | n/a                           |
| 17 | O'Brien, Erin Keely; Nguyen, Anh B.; Persoskie, Alexander; Hoffman, Allison C.                                     | 2017 | 3738        | Non-experimental   | Cross-sectional      | Non, Current, and Former smokers                            | General                    | Descriptor                  | Rated whether a cigarette advertised as "low nicotine" would be more or less harmful/addictive than a typical cigarette                                                                                                                             | n/a                           | n/a                            | n/a                           |
| 18 | O'Connor, Richard J.; Ashare, Rebecca L.; Fix, Brian V.; Hawk, Larry W.; Cummings, K. Michael; Schmidt, William C. | 2007 | 424         | Quasi-Experimental | Cross-sectional      | Current smokers, Susceptible and Non-susceptible nonsmokers | Ad                         | General                     | Branding                                                                                                                                                                                                                                            | n/a                           | n/a                            | n/a                           |
| 19 | O'Connor, Richard J.; Hyland, Andrew; Giovino, Gary A.;                                                            | 2005 | 2028        | Non-experimental   | Cross-sectional      | Current smokers                                             | Product                    | General                     | Tobacco companies are developing new types of cigarettes or                                                                                                                                                                                         | n/a                           | n/a                            | n/a                           |



| ID | Authors                                                                                                                                                             | Year | Sample Size | Type                  | Data Collection Type | Smoking Status                   | Commercial Exposure Medium | Commercial Exposure Feature | Commercial Exposure Detail                                                                                                                                        | Public Health Exposure Medium | Public Health Exposure Feature | Public Health Exposure Detail                                                                                     |
|----|---------------------------------------------------------------------------------------------------------------------------------------------------------------------|------|-------------|-----------------------|----------------------|----------------------------------|----------------------------|-----------------------------|-------------------------------------------------------------------------------------------------------------------------------------------------------------------|-------------------------------|--------------------------------|-------------------------------------------------------------------------------------------------------------------|
|    | Fong, Geoffrey T.; Cummings, K. Michael                                                                                                                             |      |             |                       |                      |                                  |                            |                             | cigarette-like products that are supposed to be less harmful than ordinary cigarettes. Have you heard of such products? If yes, unaided recall of product brands. |                               |                                |                                                                                                                   |
| 20 | Parascandola, Mark; Augustson, Erik; O'Connell, Mary E.; Marcus, Stephen                                                                                            | 2009 | 5586        | Non-experimental      | Cross-sectional      | Current and Former smokers       | Product                    | General                     | Have you heard of the following products: Quest                                                                                                                   | n/a                           | n/a                            | n/a                                                                                                               |
| 21 | Parascandola, Mark; Hurd, Ami L.; Augustson, Erik                                                                                                                   | 2008 | 9736        | Non-experimental      | Cross-sectional      | Non, Current, and Former smokers | Product                    | General                     | Have you heard of the following products: Quest                                                                                                                   | n/a                           | n/a                            | n/a                                                                                                               |
| 22 | Patel, Minal; Cuccia, Alison F.; Czaplicki, Lauren; Donovan, Emily M.; Simard, Bethany; Pitzer, Lindsay; Hair, Elizabeth C.; Schillo, Barbara A.; Vallone, Donna M. | 2019 | 917         | Non-experimental      | Cross-sectional      | Current smokers                  | n/a                        | n/a                         | n/a                                                                                                                                                               | General                       | Descriptor                     | The federal government may require tobacco companies to significantly reduce the level of nicotine in cigarettes. |
| 23 | Popova, Lucy; Owusu, Daniel; Nyman, Amy L.; Weaver, Scott R.;                                                                                                       | 2019 | 1185        | Randomized Experiment | Cross-sectional      | Current smokers                  | n/a                        | n/a                         | n/a                                                                                                                                                               | General                       | Descriptor                     | What would you most likely do if [FRAMING]?" where                                                                |

| ID | Authors                                                                                                 | Year | Sample Size | Type               | Data Collection Type | Smoking Status  | Commercial Exposure Medium | Commercial Exposure Feature | Commercial Exposure Detail | Public Health Exposure Medium | Public Health Exposure Feature | Public Health Exposure Detail                                                                                                                                                                                                                                                                                                                                                                                                                  |
|----|---------------------------------------------------------------------------------------------------------|------|-------------|--------------------|----------------------|-----------------|----------------------------|-----------------------------|----------------------------|-------------------------------|--------------------------------|------------------------------------------------------------------------------------------------------------------------------------------------------------------------------------------------------------------------------------------------------------------------------------------------------------------------------------------------------------------------------------------------------------------------------------------------|
|    | Yang, Bo; Huang, Jidong; Ashley, David L.                                                               |      |             |                    |                      |                 |                            |                             |                            |                               |                                | the FRAMING was (1) “nicotine levels were reduced by 95% in all cigarettes for sale”; (2) “the government reduced nicotine levels by 95% in all cigarettes for sale”; (3) “all cigarettes for sale were changed so that they were no longer addictive”; (4) “all cigarettes for sale were changed so that they no longer relieved your cravings”; or (5) “all cigarettes for sale were changed so that you would be able to quit more easily?” |
| 24 | Shadel, William G.; Lerman, Caryn; Cappella, Joseph; Strasser, Andrew A.; Pinto, Angela; Hornik, Robert | 2006 | 200         | Quasi-Experimental | Cross-sectional      | Current smokers | Ad                         | General                     | Branding                   | n/a                           | n/a                            | n/a                                                                                                                                                                                                                                                                                                                                                                                                                                            |

| ID | Authors                                                                                                     | Year | Sample Size | Type                  | Data Collection Type | Smoking Status                                              | Commercial Exposure Medium | Commercial Exposure Feature | Commercial Exposure Detail                                                                                                                    | Public Health Exposure Medium | Public Health Exposure Feature | Public Health Exposure Detail                                                                                                                                                                                                                                                                                                                                                                                  |
|----|-------------------------------------------------------------------------------------------------------------|------|-------------|-----------------------|----------------------|-------------------------------------------------------------|----------------------------|-----------------------------|-----------------------------------------------------------------------------------------------------------------------------------------------|-------------------------------|--------------------------------|----------------------------------------------------------------------------------------------------------------------------------------------------------------------------------------------------------------------------------------------------------------------------------------------------------------------------------------------------------------------------------------------------------------|
| 25 | Strasser, A. A.; Tang, K. Z.; Tuller, M. D.; Cappella, J. N.                                                | 2008 | 500         | Randomized Experiment | Cross-sectional      | Current smokers                                             | Ad                         | Descriptor/<br>Pack color   | Text v. no text ad, red v. blue pack color; All conditions showed pack branding and "low nicotine," "extra low nicotine," and "nicotine free" | n/a                           | n/a                            | n/a                                                                                                                                                                                                                                                                                                                                                                                                            |
| 26 | Villanti, Andrea C.; West, Julia C.; Mays, Darren; Donny, Eric C.; Cappella, Joseph N.; Strasser, Andrew A. | 2019 | 521         | Randomized Experiment | Cross-sectional      | Past 30-day tobacco users and non-past 30-day tobacco users | n/a                        | n/a                         | n/a                                                                                                                                           | General                       | Descriptor                     | (1) nicotine is the addictive substance in tobacco products, (2) nicotine makes it easier for people to start smoking regularly, (3) nicotine makes it harder for people to quit smoking, (4) nicotine does not cause cancer, (5) chemicals in cigarette smoke, not nicotine, largely cause cancer, heart disease, and other health problems related to smoking, and (6) nicotine can be used safely long-term |

| <b>ID</b> | <b>Authors</b> | <b>Year</b> | <b>Sample Size</b> | <b>Type</b> | <b>Data Collection Type</b> | <b>Smoking Status</b> | <b>Commercial Exposure Medium</b> | <b>Commercial Exposure Feature</b> | <b>Commercial Exposure Detail</b> | <b>Public Health Exposure Medium</b> | <b>Public Health Exposure Feature</b> | <b>Public Health Exposure Detail</b>                              |
|-----------|----------------|-------------|--------------------|-------------|-----------------------------|-----------------------|-----------------------------------|------------------------------------|-----------------------------------|--------------------------------------|---------------------------------------|-------------------------------------------------------------------|
|           |                |             |                    |             |                             |                       |                                   |                                    |                                   |                                      |                                       | in quit smoking products like nicotine patches, gum, or lozenges. |

## 3. Results Summary

| Message Features       | Message Processing Outcomes |                                                                  |                                                                                                       |                                                                                                            |                                                                                         |                                                                   |
|------------------------|-----------------------------|------------------------------------------------------------------|-------------------------------------------------------------------------------------------------------|------------------------------------------------------------------------------------------------------------|-----------------------------------------------------------------------------------------|-------------------------------------------------------------------|
|                        | Attention                   | Recall                                                           | Subjective Ratings or Reactions                                                                       | Attitudes & Beliefs                                                                                        | Intentions                                                                              | Behavior                                                          |
| <b>Commercial</b>      |                             |                                                                  |                                                                                                       |                                                                                                            |                                                                                         |                                                                   |
| <b>Product/Ad/Pack</b> |                             | Parascandola, 2008 ↓<br>Parascandola, 2009 ↓<br>O'Connor, 2005 ↑ | O'Connor, 2007 ↓<br>Fraser, 2017 ↓                                                                    | Mercincavage, 2017 ↓<br>Shadel, 2006 ↓<br>Strasser, 2008 ↓                                                 | O'Connor, 2007 ↑                                                                        | O'Connor, 2005 ↓<br>Parascandola, 2009 ↓<br>Mercincavage, 2017 ↑↓ |
| Color                  | Lochbuehler, 2016 ↑         | Johnson, 2019 ↑<br>Lochbuehler, 2016 NS                          | Johnson, 2019 ↑                                                                                       | Johnson, 2019 NS<br>Lochbuehler, 2016 NS<br>Strasser, 2008 NS                                              | Johnson, 2019 NS                                                                        |                                                                   |
| Descriptor             |                             |                                                                  | Denlinger-Apte, 2017 ↓<br>Mercincavage, 2016 ↓                                                        | Denlinger-Apte, 2017 ↓<br>Gallopel-Morvan, 2010 ↓<br>O'Brien, 2017 ↓<br>Nguyen, 2018 ↓<br>Strasser, 2008 ↓ | Denlinger-Apte, 2017 ↓                                                                  | Denlinger-Apte, 2017 NS<br>Mercincavage, 2016 ↓                   |
| <b>Public health</b>   |                             |                                                                  |                                                                                                       |                                                                                                            |                                                                                         |                                                                   |
| <b>General</b>         |                             |                                                                  | Bolcic-Ja, 2015 ↑<br>Connolly, 2012 ↑<br>Chung-Hall, 2018 ↑<br>Fix, 2011 ↑<br>Denlinger-Apte, 2019 ↑↓ | Byron, 2018 ↓<br>Byron, 2019 ↑<br>Popova, 2019 ↑<br>Villanti, 2019 ↑<br>Fraser, 2017 ↑                     | Byron, 2018 ↓<br>Popova, 2019 ↑↓<br>Hall, 2019 ↑<br>Patel, 2019 ↑↓<br>Villanti, 2019 NS |                                                                   |
| <b>Warning Label</b>   | Lochbuehler, 2016 NS        | Lochbuehler, 2016 NS                                             |                                                                                                       | Lochbuehler, 2016 ↑                                                                                        |                                                                                         |                                                                   |

NS = Not significant; ↑ = associated with an increased outcome; ↓ associated with a decreased outcome. Studies include different outcome targets, methodologies, and designs. Outcome directions are generally associated with greater attention and recall, positive subjective ratings and reactions, positive attitudes and beliefs, increased use intentions, and increased RNC behavior.
